# Supplementary material
Source: Research Square preprint supplement (doi:10.21203/rs.3.rs-9329261/v1)
Supplement: Supplementary file 2 [file 8e132434823913890809e1d8.pdf]

Supplementary information

**Time-resolved phenotypic profiling maps EGFR and c-Met trafficking signatures**

**Kenji Tanabe<sup>1,\*</sup>**

<sup>1</sup> Institute for Comprehensive Medical Sciences, Tokyo Women's Medical University,  
8-1, Kawada-cho, Shinjuku-ku, 162-8666 Tokyo, Japan

\* Correspondence: [tanabe.kenji@twmu.ac.jp](mailto:tanabe.kenji@twmu.ac.jp)

## Index

### Supplementary Figures

**Supplementary Figure S1.** Representative images of the EGF/EGFR time-course assay.

**Supplementary Figure S2.** Global overview of compound clustering in the EGF/EGFR time-course assay.

**Supplementary Figure S3.** EGFR inhibitors define a coherent phenotype in the EGFR time-course assay.

**Supplementary Figure S4.** Signed (non-aggregated) heatmaps for the EGFR-inhibitor and PI3K-inhibitor clusters.

**Supplementary Figure S5.** Significance maps corresponding to Fig. 3e.

**Supplementary Figure S6.** Workflow for the HGF/c-Met time-course assay.

**Supplementary Figure S7.** Representative images of the HGF/c-Met time-course assay.

**Supplementary Figure S8.** Global overview of compound clustering in the HGF/c-Met time-course assay.

**Supplementary Figure S9.** Significance maps corresponding to Fig. 4e.

**Supplementary Figure S10.** Per-compound granularity rank trajectories and corresponding significance maps for receptor degradation-inhibitor groups.

**Supplementary Figure S11.** Lipid-marker signatures in receptor degradation-inhibitor groups.

**Supplementary Figure S12.** Robustness of Fig. 5c signatures to selection-stringency thresholds.

**Supplementary Figure S13.** Lipid-feature gradients on the fused UMAP and locations of receptor degradation inhibitors.

**Supplementary Tables (\* provided as a separate CSV file)**

**Supplementary Table S1.** Compound list and plate layout.\*

**Supplementary Table S2.** Compounds excluded by image-based QC.

**Supplementary Table S3A.** Image feature classes used in EGFR HCS profiling (summary).

**Supplementary Table S3B.** Complete list of image feature names used in the EGF/EGFR assay analyses.\*

**Supplementary Table S4A.** Image feature classes used in Cell Painting profiling (summary).

**Supplementary Table S4B.** Complete list of Cell Painting image feature names used in the analyses.\*

**Supplementary Table S5.** Features removed by correlation-based pruning in the EGF/EGFR assay ( $|r| \geq 0.95$ ).\*

**Supplementary Table S6.** Features removed by correlation-based pruning in the Cell Painting dataset ( $|r| \geq 0.95$ ).\*

**Supplementary Table S7.** Duplicate compounds and their plate positions.

**Supplementary Table S8.** MOA labels used for compound-level classification.\*

**Supplementary Table S9.** Compounds selected as extreme responders for Fig. 3e.

**Supplementary Table S10.** Representative signed-EMD features used for heatmaps in Figs. 3e, 4e, and 5c.

**Supplementary Table S11.** Compounds selected as extreme responders for Fig. 4e.

**Supplementary Table S12.** Empirically defined EGFR and c-Met degradation-inhibitor groups and excluded high-basal compounds (Fig. 5).

**Supplementary Table S13.** Rationale for assigning degradation-inhibiting compounds to candidate cellular process nodes (Fig. 6c).

**Supplementary Table S14A.** Image feature classes used in the HGF/c-Met assay (summary).

**Supplementary Table S14B.** Complete list of image feature names used in the HGF/c-Met assay analyses.\*

**Supplementary Table S15.** Features removed by correlation-based pruning in the HGF/c-Met assay ( $|r| \geq 0.95$ ).\*

**Supplementary Table S16.** Microscope acquisition settings for the EGF and HGF/c-Met time-course assays and the Cell Painting assay.

**Supplementary Table S17.** Compound list for the hierarchical clustering heatmap in Supplementary Fig. S2 (EGF/EGFR assay).\*

**Supplementary Table S18.** Compound list for the hierarchical clustering heatmap in Supplementary Fig. S8 (HGF/c-Met assay).\*
